## CLINICAL INVESTIGATIONS

Anesthesiology  
78:427-435, 1993  
© 1993 American Society of Anesthesiologists, Inc.  
J. B. Lippincott Company, Philadelphia

# Inhaled Nitric Oxide Selectively Reverses Human Hypoxic Pulmonary Vasoconstriction without Causing Systemic Vasodilation

Claes G. Frostell, M.D., Ph.D.,\* Hans Blomqvist, M.D., Ph.D.,\* Göran Hedenstierna, M.D., Ph.D.,†  
Jan Lundberg, M.D., Ph.D.,‡ Warren M. Zapol, M.D.§

**Background:** Nitric oxide (NO), an endothelium-derived relaxing factor, acts as a local vasodilator. The authors examined the effects of NO on pulmonary and systemic circulation in human volunteers.

**Methods:** Nine healthy adults were studied awake while breathing 1) air, 2) 12% O<sub>2</sub> in N<sub>2</sub>, 3) followed by the same mixture of O<sub>2</sub> and N<sub>2</sub> containing 40 ppm of NO. Pulmonary artery and radial artery pressures were monitored.

**Results:** The PaO<sub>2</sub> decreased from 106 ± 4 (mean ± standard error of the mean) while breathing air (21% O<sub>2</sub>) to 47 ± 2 mmHg after 6 min of breathing 12% O<sub>2</sub>. Concomitantly, the pulmonary artery mean pressure (PAP) increased from 14.7 ± 0.8 mmHg to 19.8 ± 0.9 mmHg, and the cardiac output (CO) increased from 6.1 ± 0.4 to 7.7 ± 0.6 L/min. After adding 40 ppm NO to the inspired gas while maintaining the FiO<sub>2</sub> at 0.12, the PAP decreased ( $P < 0.01$ , by analysis of variance) to the

level when breathing air while the PaO<sub>2</sub> and PaCO<sub>2</sub> were unchanged. The dilation (or recruitment) of pulmonary vessels produced by inhaling NO during hypoxia was not accompanied by any alteration in the systemic vascular resistance or mean arterial pressure (MAP). The authors also examined the effects of inhaling NO while breathing air. Breathing 40 ppm NO in 21% O<sub>2</sub> for 6 min produced no significant changes of PAP, CO, PaO<sub>2</sub>, MAP, or central venous pressure. Plasma endothelinlike immunoreactivity concentrations did not change either during hypoxia or hypoxia with NO inhalation.

**Conclusions:** Inhalation of 40 ppm NO selectively induced pulmonary vasodilation and reversed hypoxic pulmonary vasoconstriction in healthy humans without causing systemic vasodilation. (Key words: Anesthetics: nitric oxide. Heart: vascular pressures. Hormones: endothelin. Lung: vascular resistance, hypoxia. Muscle, smooth: endothelium-derived relaxing factor.)

This article is accompanied by an editorial. Please see: Pearl RG: Inhaled nitric oxide: The past, the present, and the future. ANESTHESIOLOGY 78:413-416, 1993.

\* Associate Professor, Department of Anaesthesia and Intensive Care, Danderyd Hospital, Danderyd.

† Professor, Department of Clinical Physiology, Uppsala University Hospital, Uppsala, Sweden.

‡ Professor, Department of Pharmacology, Karolinska Institute, Stockholm, Sweden.

§ Reginald Jenney Professor of Anesthesia, Harvard Medical School, Massachusetts General Hospital, Boston, Massachusetts.

Received from the Department of Clinical Physiology at Uppsala University Hospital, Uppsala, Sweden. Accepted for publication October 2, 1992. Supported by funds from the Swedish Medical Research Council grants 5315, 9073, and 6554; AGA Medical Research Fund, Lidingö, Sweden; American Council for Tobacco Research, New York, New York; Swedish Tobacco Company, Stockholm, Sweden; the Swedish Environmental Protection Agency, Stockholm, Sweden; and Public Health Service grant HL-42397, Bethesda, Maryland. Dr. Frostell was the recipient of a Fogarty International Fellowship. Presented in part at the Annual Meeting of the American Society of Anesthesiologists, San Francisco, California, October 26-30, 1991.

Address reprint requests to Professor Hedenstierna: Department of Clinical Physiology, Uppsala University Hospital, S-751 85 Uppsala, Sweden.

IN 1987, it was reported that nitric oxide (NO) is an important endothelium-derived relaxing factor.<sup>1-3</sup> It is produced by the endothelium from arginine and acts as a local vasodilator, diffusing into subjacent vascular smooth muscle and combining intracellularly with the heme present in guanylate cyclase.<sup>4,5</sup> This activates the guanylate cyclase, resulting in an increased synthesis of the second messenger, cyclic guanosine 3',5' monophosphate and consequent relaxation of the smooth muscle cells.<sup>5-7</sup> It has been established that clinically used vasodilators, such as sodium nitroprusside and nitroglycerin, exert their effects by releasing NO intracellularly.<sup>6-8</sup>

We recently reported that inhalation of 5-80 ppm NO causes pulmonary vasodilation (*i.e.*, vascular relaxation with dilation and, possibly, recruitment) during pulmonary vasoconstriction caused by severe hypoxia (HPV) or an infusion with a thromboxane analogue in awake lambs.<sup>9</sup> In other awake lambs provoked by protamine-induced pulmonary hypertension after endogenous thromboxane release, pulmonary vasodilation was achieved when inhaling 180 ppm NO.<sup>10</sup> No systemic vasodilation occurred at these levels of inhaled

# INHALED NO REVERSES HYPOXIC PULMONARY VASOCONSTRICTION

31. Radermacher P, Huet Y, Pluskwa F, Herigault R, Mal H, Teissie B, Lemaire F: Comparison of ketanserin and sodium nitroprusside in patients with severe ARDS. *ANESTHESIOLOGY* 68:152-157, 1988
32. Falke K, Rossaint R, Pison U, Slama K, Lopez F, Santak B, Zapol WM: Inhaled nitric oxide selectively reduces pulmonary hypertension in severe ARDS and improves gas exchange as well as right heart ejection fraction: A case report (abstr). *Am Rev Respir Dis* 143(suppl):A248, 1991
33. Roberts JD, Polaner DM, Todres D, Lang P, Zapol WM: Inhaled nitric oxide (NO): A selective pulmonary vasodilator for the treatment of persistent pulmonary hypertension of the newborn (PPHN) (abstr). *Circulation* 84(suppl):A1279, 1991
34. Centers for Disease Control: Recommendations for Occupational Safety and Health Standard. *MMWR Morb Mortal Wkly Rep* 37(suppl S-7):21, 1988
35. Frampton MW, Voter KZ, Morrow PE, Roberts NJ Jr, Gavras JB: Effects of NO<sub>2</sub> exposure on human host defense (abstr). *Am Rev Respir Dis* 145:A455, 1992
36. Sandstrom T, Wilnerzon-Thorn R, Bjerner L, Stjernberg N: Repeated exposure to nitrogen dioxide causes a different cell response in the lung in comparison with single exposure (abstr). *Am Rev Respir Dis* 145(suppl):A455, 1992
37. Bylin G, Hedenstierna G, Lindvall T, Sundin B: Ambient nitrogen dioxide concentrations increase bronchial responsiveness in subjects with mild asthma. *Eur Respir J* 1:606-612, 1988
38. Maeda N, Imaizumi K, Kon K, Shiga T: A kinetic study on functional impairment of nitric oxide-exposed rat erythrocytes. *Environ Health Perspect* 73:171-177, 1987
39. Nakajima T, Oda H, Kusumoto S, Nogami H: Biological effects of nitrogen dioxide and nitric oxide, Nitrogen Oxides and Their Effects on Health. Edited by Lee SD. Ann Arbor, Ann Arbor Science, 1980, pp 121-141
